# Supplementary material for: Determining Ancestry between Rodent- and Human-Derived Virus Sequences in Endemic Foci: Towards a More Integral Molecular Epidemiology of Lassa Fever within West Africa
Source: Biology (Basel). 2020 Feb 7;9(2):26. doi: 10.3390/biology9020026 (PMC7167862; doi:10.3390/biology9020026)
Supplement: Supplementary file 1 [file biology-09-00026-s001.xlsx]

## Sheet: table S1
Protocoll Diagnostic-PCR
Date:
Lab.-Staff Name:
Infectious Agent	Lassa virus
Extraction used	QIAamp Viral RNA
Cycler:	Biorad
PCR-Kit:	Name		Supplier	Order-No.
	OneStep RT-PCR Kit		QIAGEN
Oligosequences:	LVSnig 1669+	5'-TATATTGAGTCCTCCTGACACAG-3'
	LVSnig 2511-	5'-TGTTGGAGACCATCAAGGTT-3'
	Patient samples			Water		Neg.-Extr.	Run Control
Number of PCR-Reactions:	4		0	1		1	1
Total reactions:	7
Pipette scheme
Total volume	20
Volume Mastermix/Reaction:	17
Sample volume:	3
Reagent	Conc. Stock Sol.		Final Concentration		Volume/Re-action [µl]	Total volume [µl]	Volume to pipette (+5%)	Reagent
Water					9.4	65.8	69.09	Water
OneStep Buffer	5	x	1	x	4	28	29.4	OneStep Buffer
dNTP	10	mM	0.4	mM	0.8	5.6	5.88	dNTP
Fwd	10	µM	0.6	µM	1	7	7.35	Fwd
Rev	10	µM	0.6	µM	1	7	7.35	Rev
Enzyme Mix					0.8	5.6	5.88	Enzyme Mix
					17
Temperature profile:
	Temperature	Time
	50	30	min.
Cycling	95	15	min.
	95	30	sec.
	53	30	sec.		35x
	72	1	min.

## Sheet: table S2
Table S2. List of LASV sequences from rodents used in the analysis (n = 102).
label	country	locality	taxa	date	N° GP	N° NP	reference
KAK-428	Nigeria	Kako	Hylomyscus pamfi	2012-03-15	KT992425	KT992425	Olayemi et al. 2016b
DGD-4	Guinea	Denguedou	Mastomys Denguedou	2005-02-16	MN123651	DQ832692	Lecompte et al. 2006, this study
DGD-28	Guinea	Denguedou	Mastomys Denguedou	2005-02-16	MN123652	DQ832694	Lecompte et al. 2006, this study
DGD-35	Guinea	Denguedou	Mastomys Denguedou	2005-02-17	MN123653	DQ832695	Lecompte et al. 2006, this study
DGD-43	Guinea	Denguedou	Mastomys Denguedou	2005-02-17	GU830842	DQ832696	Lecompte et al. 2006, Ölschläger et al. 2010
DGD-87	Guinea	Denguedou	Mastomys Denguedou	2005-02-17	MN123654	DQ832697	Lecompte et al. 2006
DGD-104	Guinea	Denguedou	Mastomys Denguedou	2005-02-17	MN123655	DQ832698	Lecompte et al. 2006
DGD-112	Guinea	Denguedou	Mastomys Denguedou	2005-02-17	MN123656	DQ832699	Lecompte et al. 2006
EGU-106	Nigeria	Eguare-Egoro	Mastomys Ekpoma	2011-03-23	KP640564	MN123697	Olayemi et al. 2016, this study
EGU-240	Nigeria	Eguare-Egoro	Mastomys Ekpoma	2011-10-17	KP640566	MN123698	Olayemi et al. 2016, this study
EGU-271	Nigeria	Eguare-Egoro	Mastomys Ekpoma	2011-10-19	KP640567	MN123699	Olayemi et al. 2016, this study
EGU-88	Nigeria	Eguare-Egoro	Mastomys Ekpoma	2011-03-22	KP640562	MN123700	Olayemi et al. 2016, this study
EKP-447	Nigeria	Ekpoma	Mastomys Ekpoma	2012-03-26	KP640568	MN123701	Olayemi et al. 2016, this study
EKP-508	Nigeria	Ekpoma	Mastomys Ekpoma	2012-10-18	KP640569	MN123702	Olayemi et al. 2016, this study
EKP-512	Nigeria	Ekpoma	Mastomys Ekpoma	2012-10-18	KP640570	MN123703	Olayemi et al. 2016, this study
EKP-518	Nigeria	Ekpoma	Mastomys Ekpoma	2012-10-18	KP640571	MN123704	Olayemi et al. 2016, this study
EKP-521	Nigeria	Ekpoma	Mastomys Ekpoma	2012-10-18	KP640572	MN123705	Olayemi et al. 2016, this study
EKP-539	Nigeria	Ekpoma	Mastomys Ekpoma	2012-10-18	KP640573	MN123706	Olayemi et al. 2016, this study
EKP-549	Nigeria	Ekpoma	Mastomys Ekpoma	2012-10-18	KP640574	MN123707	Olayemi et al. 2016, this study
EKP-555	Nigeria	Ekpoma	Mastomys Ekpoma	2012-10-18	KP640575	MN123708	Olayemi et al. 2016, this study
EKP-601	Nigeria	Ekpoma	Mastomys Ekpoma	2012-10-21	KP640576	MN123709	Olayemi et al. 2016, this study
EKP-1187	Nigeria	Ekpoma	Mastomys Ekpoma	2014-10-17	MT001745	MT001758	this study
EKP-1215	Nigeria	Ekpoma	Mastomys Ekpoma	2014-10-18	MT001746	MT001759	this study
EKP-1350	Nigeria	Ekpoma	Mastomys Ekpoma	2015-04-02	MT001747	MT001760	this study
EKP-1363	Nigeria	Ekpoma	Mastomys Ekpoma	2015-04-03	MT001748	MT001761	this study
EKP-1374	Nigeria	Ekpoma	Mastomys Ekpoma	2015-04-04	MT001749	MT001762	this study
EKP-1429	Nigeria	Ekpoma	Mastomys Ekpoma	2015-07-17	MT001750	MT001763	this study
EKP-1441	Nigeria	Ekpoma	Mastomys Ekpoma	2015-07-18	MT001751	MT001764	this study
EKP-1526	Nigeria	Ekpoma	Mastomys Ekpoma	2015-10-14	MT001752	MT001765	this study
EKP-1908	Nigeria	Ekpoma	Mastomys Ekpoma	2016-01-29	MT001753	MT001766	this study
EKP-1951	Nigeria	Ekpoma	Mastomys Ekpoma	2016-04-11	MT001754	MT001767	this study
EKP-1960	Nigeria	Ekpoma	Mastomys Ekpoma	2016-04-12	MT001755	MT001768	this study
EKP-1969	Nigeria	Ekpoma	Mastomys Ekpoma	2016-04-13	MT001756	MT001769	this study
EKP-1984	Nigeria	Ekpoma	Mastomys Ekpoma	2016-04-13	MT001757	MT001770	this study
ONM-299	Nigeria	Onmba-abena	Mastomys erythroleucus	2011-10-23	KT992422	KT992422	Olayemi et al. 2016b
ONM-700	Nigeria	Onmba-abena	Mastomys erythroleucus	2012-10-29	KT992424	KT992424	Olayemi et al. 2016b
Ba289	Guinea	Bantou	Mastomys Faranah	2003-09-25	GU830838	KP339057	Ölschläger et al. 2010, Fichet-Calvet et al. 2016
Ba366	Guinea	Bantou	Mastomys Faranah	2003-09-28	GU830839	KP339063	Ehichioya et al. 2011, Fichet-Calvet et al. 2016
Ba377	Guinea	Bantou	Mastomys Faranah	2003-09-28	GU830840	KP339065	Ölschläger et al. 2010, Fichet-Calvet et al. 2016
Ba384	Guinea	Bantou	Mastomys Faranah	2003-09-29	GU830841	KP339068	Ölschläger et al. 2010, Fichet-Calvet et al. 2016
Ta491	Guinea	Tanganya	Mastomys Faranah	2003-10-05	GU830843	KP339079	Ölschläger et al. 2010, Fichet-Calvet et al. 2016
Bri08	Guinea	Brissa	Mastomys Faranah	2013-12-14	MN123657	KT833205	Fichet-Calvet et al. 2016, this study
Bri39	Guinea	Brissa	Mastomys Faranah	2013-12-16	MN123658	KT833206	Fichet-Calvet et al. 2016, this study
Dal02	Guinea	Dalafilani	Mastomys Faranah	2013-11-28	MN123659	KT833196	Fichet-Calvet et al. 2016, this study
Dal04	Guinea	Dalafilani	Mastomys Faranah	2013-11-28	MN123660	KT833197	Fichet-Calvet et al. 2016, this study
Dal11	Guinea	Dalafilani	Mastomys Faranah	2013-11-28	MN123661	KT833198	Fichet-Calvet et al. 2016, this study
Dal17	Guinea	Dalafilani	Mastomys Faranah	2013-11-29	MN123662	KT833199	Fichet-Calvet et al. 2016, this study
Dal25	Guinea	Dalafilani	Mastomys Faranah	2013-11-29	MN123663	KT833200	Fichet-Calvet et al. 2016, this study
Dal53	Guinea	Dalafilani	Mastomys Faranah	2014-04-19	MN123664	KT833222	Fichet-Calvet et al. 2016, this study
Dam03	Guinea	Damania	Mastomys Faranah	2013-11-15	MN123665	KT833182	Fichet-Calvet et al. 2016, this study
Dam05	Guinea	Damania	Mastomys Faranah	2013-11-15	MN123666	KT833183	Fichet-Calvet et al. 2016, this study
Dam15	Guinea	Damania	Mastomys Faranah	2013-11-15	MN123667	KT833184	Fichet-Calvet et al. 2016, this study
Dam20	Guinea	Damania	Mastomys Faranah	2013-11-16	MN123668	KT833185	Fichet-Calvet et al. 2016, this study
Dam38	Guinea	Damania	Mastomys Faranah	2013-11-16	MN123669	KT833186	Fichet-Calvet et al. 2016, this study
Dam49	Guinea	Damania	Mastomys Faranah	2013-11-17	MN123670	KT833187	Fichet-Calvet et al. 2016, this study
Dam71	Guinea	Damania	Mastomys Faranah	2014-03-26	MN123671	KT833207	Fichet-Calvet et al. 2016, this study
Dam72	Guinea	Damania	Mastomys Faranah	2014-03-26	MN123672	KT833208	Fichet-Calvet et al. 2016, this study
Dam90	Guinea	Damania	Mastomys Faranah	2014-03-27	MN123673	KT833209	Fichet-Calvet et al. 2016, this study
Dam95	Guinea	Damania	Mastomys Faranah	2014-03-27	MN123674	KT833210	Fichet-Calvet et al. 2016, this study
Kho10	Guinea	Khoria	Mastomys Faranah	2013-11-24	MN123675	KT833193	Fichet-Calvet et al. 2016, this study
Kho29	Guinea	Khoria	Mastomys Faranah	2013-11-26	MN123676	KT833194	Fichet-Calvet et al. 2016, this study
Kho30	Guinea	Khoria	Mastomys Faranah	2013-11-26	MN123677	KT833195	Fichet-Calvet et al. 2016, this study
Saf01	Guinea	Safrani	Mastomys Faranah	2013-12-03	MN123678	KT833203	Fichet-Calvet et al. 2016, this study
Sil03	Guinea	Silimi	Mastomys Faranah	2013-12-06	MN123679	KT833204	Fichet-Calvet et al. 2016, this study
Sok07	Guinea	Sokourala	Mastomys Faranah	2013-11-08	MN123680	KT833175	Fichet-Calvet et al. 2016, this study
Sok10	Guinea	Sokourala	Mastomys Faranah	2013-11-08	MN123681	KT833176	Fichet-Calvet et al. 2016, this study
Sok18	Guinea	Sokourala	Mastomys Faranah	2013-11-09	MN123682	KT833177	Fichet-Calvet et al. 2016, this study
Sok21	Guinea	Sokourala	Mastomys Faranah	2013-11-09	MN123683	KT833178	Fichet-Calvet et al. 2016, this study
Sok32	Guinea	Sokourala	Mastomys Faranah	2013-11-10	MN123684	KT833180	Fichet-Calvet et al. 2016, this study
Sok40	Guinea	Sokourala	Mastomys Faranah	2014-04-03	MN123685	KT833211	Fichet-Calvet et al. 2016, this study
Sok44	Guinea	Sokourala	Mastomys Faranah	2014-04-03	MN123686	KT833212	Fichet-Calvet et al. 2016, this study
Sok51	Guinea	Sokourala	Mastomys Faranah	2014-04-03	MN123687	KT833213	Fichet-Calvet et al. 2016, this study
Sok61	Guinea	Sokourala	Mastomys Faranah	2014-04-04	MN123688	KT833214	Fichet-Calvet et al. 2016, this study
Sok75	Guinea	Sokourala	Mastomys Faranah	2014-04-05	MN123689	KT833216	Fichet-Calvet et al. 2016, this study
Son85	Guinea	Sonkonia	Mastomys Faranah	2014-04-08	MN123690	KT833219	Fichet-Calvet et al. 2016, this study
Son109	Guinea	Sonkonia	Mastomys Faranah	2014-04-09	MN123691	KT833220	Fichet-Calvet et al. 2016, this study
Yar14	Guinea	Yarawalia	Mastomys Faranah	2013-11-20	MN123692	KT833188	Fichet-Calvet et al. 2016, this study
Yar20	Guinea	Yarawalia	Mastomys Faranah	2013-11-20	MN123693	KT833189	Fichet-Calvet et al. 2016, this study
Yar24	Guinea	Yarawalia	Mastomys Faranah	2013-11-21	MN123694	KT833190	Fichet-Calvet et al. 2016, this study
Yar36	Guinea	Yarawalia	Mastomys Faranah	2013-11-21	MN123695	KT833191	Fichet-Calvet et al. 2016, this study
Yar46	Guinea	Yarawalia	Mastomys Faranah	2013-11-21	MN123696	KT833192	Fichet-Calvet et al. 2016, this study
LM032-SLE-2010	Sierra Leone	Panguma	Mastomys Kenema	2009-01-21	KM822111	KM822111	Andersen et al. 2015
LM222-SLE-2010	Sierra Leone	Koi	Mastomys Kenema	2009-02-18	KM822113	KM822113	Andersen et al. 2015
LM395-SLE-2009	Sierra Leone	Ngiehun	Mastomys Kenema	2009-07-22	KM822115	KM822115	Andersen et al. 2015
LM765-SLE-2012	Sierra Leone	Yumbuma	Mastomys Kenema	2012-10-19	KM822117	KM822117	Andersen et al. 2015
LM771-SLE-2012	Sierra Leone	Jaidia	Mastomys Kenema	2012-10-19	KM822118	KM822118	Andersen et al. 2015
LM774-SLE-2012	Sierra Leone	Jaidia	Mastomys Kenema	2012-10-19	KM822120	KM822120	Andersen et al. 2015
LM776-SLE-2012	Sierra Leone	Jaidia	Mastomys Kenema	2012-10-19	KM822122	KM822122	Andersen et al. 2015
LM778-SLE-2012	Sierra Leone	Jaidia	Mastomys Kenema	2012-10-19	KM822124	KM822124	Andersen et al. 2015
LM779-SLE-2012	Sierra Leone	Jaidia	Mastomys Kenema	2012-10-19	KM822126	KM822126	Andersen et al. 2015
Z0947-SLE-2011	Sierra Leone	?	Mastomys Kenema	2011-06-30	KM822130	KM822130	Andersen et al. 2015
Mad-39	Guinea	Madina Oula	Mastomys Madina	2014-05-08	KT992416	KT992416	Olayemi et al. 2016b
Mad-41	Guinea	Madina Oula	Mastomys Madina	2014-05-08	KT992417	KT992417	Olayemi et al. 2016b
Mad-63	Guinea	Madina Oula	Mastomys Madina	2014-05-09	KT992419	KT992419	Olayemi et al. 2016b
Mad-69	Guinea	Madina Oula	Mastomys Madina	2014-05-09	KT992420	KT992420	Olayemi et al. 2016b
Mad-83	Guinea	Madina Oula	Mastomys Madina	2014-05-10	KT992421	KT992421	Olayemi et al. 2016b
R	Mali	Soromba	Mastomys Mali	2009-06-08	KF478765	KF478765	Safronetz et al. 2013
R114	Mali	Bamba	Mastomys Mali	2012-03-06	KF478766	KF478766	Safronetz et al. 2013
R123	Mali	Ouoma	Mastomys Mali	2012-03-06	KF478768	KF478768	Safronetz et al. 2013
R16	Mali	Komina	Mastomys Mali	2012-03-03	KF478767	KF478767	Safronetz et al. 2013
JIR76	Ghana	Jirandogo	Mus baoulei	2011-05-28	JX845171	JX845169	Kronmann et al. 2013
CIV608	Côte d'Ivoire	Gbagroube	Mus setulosus	2005-03-30	GU830848	GU830848	Coulibaly N'Golo et al. 2011

## Sheet: table S3
Table S3. List of LASV sequences from humans used in the analysis (n = 96).
label	country	locality	taxa	date	N° GP	N° NP	reference
AV	Ghana/CIV	?		2000-01-07	AF246121	AF246121	Günther et al. 2000
Faranah	Guinea	Faranah hosp.		1996-06-30	KU978807	KU978807	Rossi et al. 2016
Z158	Guinea	Macenta		1981-01-15	AY628201	AY628201	Jahrling,P.B., Geisbert,J. and Ibrahim,M.S.
Z148	Liberia	Zorzor?		1980-12-15	AY628205	AY628205	Jahrling,P.B., Geisbert,J. and Ibrahim,M.S.
Weller	Nigeria	?		1980-06-30	AY628206	AY628206	Jahrling,P.B., Geisbert,J. and Ibrahim,M.S.
A4	Nigeria	Abakaliki		2008-03-05	GU481068	GU481068	Ehichioya et al. 2011
LASV100	Nigeria	Irrua hosp.	Homo Ekpoma	2017-06-30	MH887823	MH887823	Siddle et al. 2018
LASV101	Nigeria	Irrua hosp.	Homo Ekpoma	2017-06-30	MH887772	MH887772	Siddle et al. 2018
LASV103	Nigeria	Irrua hosp.	Homo Ekpoma	2017-06-30	MH887797	MH887797	Siddle et al. 2018
LASV118	Nigeria	Irrua hosp.	Homo Ekpoma	2018-06-30	MH887833	MH887833	Siddle et al. 2018
LASV119	Nigeria	Irrua hosp.	Homo Ekpoma	2018-06-30	MH887770	MH887770	Siddle et al. 2018
LASV130	Nigeria	Irrua hosp.	Homo Ekpoma	2018-06-30	MH887816	MH887816	Siddle et al. 2018
LASV133	Nigeria	Irrua hosp.	Homo Ekpoma	2018-06-30	MH887815	MH887815	Siddle et al. 2018
LASV134	Nigeria	Irrua hosp.	Homo Ekpoma	2018-06-30	MH887891	MH887891	Siddle et al. 2018
LASV140	Nigeria	Irrua hosp.	Homo Ekpoma	2018-06-30	MH887819	MH887819	Siddle et al. 2018
LASV141	Nigeria	Irrua hosp.	Homo Ekpoma	2018-06-30	MH887786	MH887786	Siddle et al. 2018
LASV145	Nigeria	Irrua hosp.	Homo Ekpoma	2018-06-30	MH887870	MH887870	Siddle et al. 2018
LASV146	Nigeria	Irrua hosp.	Homo Ekpoma	2018-06-30	MH887851	MH887851	Siddle et al. 2018
LASV147	Nigeria	Irrua hosp.	Homo Ekpoma	2018-06-30	MH887771	MH887771	Siddle et al. 2018
LASV151	Nigeria	Irrua hosp.	Homo Ekpoma	2018-06-30	MH887756	MH887756	Siddle et al. 2018
LASV153	Nigeria	Irrua hosp.	Homo Ekpoma	2018-06-30	MH887876	MH887876	Siddle et al. 2018
LASV155	Nigeria	Irrua hosp.	Homo Ekpoma	2018-06-30	MH887887	MH887887	Siddle et al. 2018
LASV158	Nigeria	Irrua hosp.	Homo Ekpoma	2018-06-30	MH887767	MH887767	Siddle et al. 2018
LASV173	Nigeria	Irrua hosp.	Homo Ekpoma	2018-06-30	MH887807	MH887807	Siddle et al. 2018
LASV174	Nigeria	Irrua hosp.	Homo Ekpoma	2018-06-30	MH887863	MH887863	Siddle et al. 2018
LASV175	Nigeria	Irrua hosp.	Homo Ekpoma	2018-06-30	MH887869	MH887869	Siddle et al. 2018
LASV176	Nigeria	Irrua hosp.	Homo Ekpoma	2018-06-30	MH887814	MH887814	Siddle et al. 2018
LASV177	Nigeria	Irrua hosp.	Homo Ekpoma	2018-06-30	MH887857	MH887857	Siddle et al. 2018
LASV182	Nigeria	Irrua hosp.	Homo Ekpoma	2018-06-30	MH887878	MH887878	Siddle et al. 2018
LASV194	Nigeria	Irrua hosp.	Homo Ekpoma	2018-06-30	MH887755	MH887755	Siddle et al. 2018
LASV198	Nigeria	Irrua hosp.	Homo Ekpoma	2018-06-30	MH887893	MH887893	Siddle et al. 2018
LASV199	Nigeria	Irrua hosp.	Homo Ekpoma	2018-06-30	MH887813	MH887813	Siddle et al. 2018
LASV202	Nigeria	Irrua hosp.	Homo Ekpoma	2018-06-30	MH887824	MH887824	Siddle et al. 2018
LASV206	Nigeria	Irrua hosp.	Homo Ekpoma	2018-06-30	MH887861	MH887861	Siddle et al. 2018
LASV208	Nigeria	Irrua hosp.	Homo Ekpoma	2018-06-30	MH887759	MH887759	Siddle et al. 2018
LASV212	Nigeria	Irrua hosp.	Homo Ekpoma	2018-06-30	MH887760	MH887760	Siddle et al. 2018
LASV213	Nigeria	Irrua hosp.	Homo Ekpoma	2018-06-30	MH887886	MH887886	Siddle et al. 2018
LASV216	Nigeria	Irrua hosp.	Homo Ekpoma	2018-06-30	MH887777	MH887777	Siddle et al. 2018
LASV66	Nigeria	Irrua hosp.	Homo Ekpoma	2017-06-30	MH887881	MH887881	Siddle et al. 2018
LASV67	Nigeria	Irrua hosp.	Homo Ekpoma	2017-06-30	MH887827	MH887827	Siddle et al. 2018
LASV69	Nigeria	Irrua hosp.	Homo Ekpoma	2017-06-30	MH887831	MH887831	Siddle et al. 2018
LASV71	Nigeria	Irrua hosp.	Homo Ekpoma	2017-06-30	MH887822	MH887822	Siddle et al. 2018
LASV73	Nigeria	Irrua hosp.	Homo Ekpoma	2017-06-30	MH887817	MH887817	Siddle et al. 2018
LASV74	Nigeria	Irrua hosp.	Homo Ekpoma	2017-06-30	MH887874	MH887874	Siddle et al. 2018
LASV75	Nigeria	Irrua hosp.	Homo Ekpoma	2017-06-30	MH887763	MH887763	Siddle et al. 2018
LASV76	Nigeria	Irrua hosp.	Homo Ekpoma	2017-06-30	MH887783	MH887783	Siddle et al. 2018
LASV77	Nigeria	Irrua hosp.	Homo Ekpoma	2017-06-30	MH887897	MH887897	Siddle et al. 2018
LASV79	Nigeria	Irrua hosp.	Homo Ekpoma	2017-06-30	MH887778	MH887778	Siddle et al. 2018
LASV81	Nigeria	Irrua hosp.	Homo Ekpoma	2017-06-30	MH887787	MH887787	Siddle et al. 2018
LASV82	Nigeria	Irrua hosp.	Homo Ekpoma	2017-06-30	MH887800	MH887800	Siddle et al. 2018
LASV84	Nigeria	Irrua hosp.	Homo Ekpoma	2017-06-30	MH887811	MH887811	Siddle et al. 2018
LASV85	Nigeria	Irrua hosp.	Homo Ekpoma	2017-06-30	MH887826	MH887826	Siddle et al. 2018
LASV86	Nigeria	Irrua hosp.	Homo Ekpoma	2017-06-30	MH887838	MH887838	Siddle et al. 2018
LASV88	Nigeria	Irrua hosp.	Homo Ekpoma	2017-06-30	MH887808	MH887808	Siddle et al. 2018
LASV91	Nigeria	Irrua hosp.	Homo Ekpoma	2017-06-30	MH887841	MH887841	Siddle et al. 2018
LASV92	Nigeria	Irrua hosp.	Homo Ekpoma	2017-06-30	MH887840	MH887840	Siddle et al. 2018
LASV93	Nigeria	Irrua hosp.	Homo Ekpoma	2017-06-30	MH887761	MH887761	Siddle et al. 2018
LASV95	Nigeria	Irrua hosp.	Homo Ekpoma	2017-06-30	MH887854	MH887854	Siddle et al. 2018
LASV97	Nigeria	Irrua hosp.	Homo Ekpoma	2017-06-30	MH887842	MH887842	Siddle et al. 2018
LASV98	Nigeria	Irrua hosp.	Homo Ekpoma	2017-06-30	MH887884	MH887884	Siddle et al. 2018
LASV99	Nigeria	Irrua hosp.	Homo Ekpoma	2017-06-30	MH887896	MH887896	Siddle et al. 2018
A37	Nigeria	Irrua hosp.	Homo Ekpoma	2008-02-25	GU481074	GU481074	Ehichioya et al. 2011
A41	Nigeria	Irrua hosp.	Homo Ekpoma	2008-02-25	GU481076	GU481076	Ehichioya et al. 2011
A18	Nigeria	Jos		2008-02-15	GU481070	GU481070	Ehichioya et al. 2011
A19	Nigeria	Jos		2008-02-15	GU481072	GU481072	Ehichioya et al. 2011
CSF	Nigeria	Jos		2000-03-28	AF333969	AF333969	Günther et al. 2001
Pinneo	Nigeria	Lassa/Jos		1969-03-03	AF181853	AF181853	Bowen et al. 2000
803213	Nigeria	Onitsha		1974-06-30	AF181854	AF181854	Bowen et al. 2000
A47	Nigeria	Uromi	Homo Ekpoma	2008-02-04	GU481078	GU481078	Ehichioya et al. 2011
GA391	Nigeria	Zaria		1977-10-15	X52400	X52400	Clegg et al. 1991
G2259-SLE-2012	Sierra Leone	Kenema hosp.		2012-01-16	KM821835	KM821835	Andersen et al. 2015
G2263-SLE-2012	Sierra Leone	Kenema hosp.	Homo Kenema	2012-01-17	KM821837	KM821837	Andersen et al. 2015
G2280-SLE-2012	Sierra Leone	Kenema hosp.	Homo Kenema	2012-01-23	KM821839	KM821839	Andersen et al. 2015
G2295-SLE-2012	Sierra Leone	Kenema hosp.	Homo Kenema	2012-01-31	KM821841	KM821841	Andersen et al. 2015
G2315-SLE-2012	Sierra Leone	Kenema hosp.	Homo Kenema	2012-02-10	KM821843	KM821843	Andersen et al. 2015
G2318-SLE-2012	Sierra Leone	Kenema hosp.	Homo Kenema	2012-02-12	KM821845	KM821845	Andersen et al. 2015
G2363-SLE-2012	Sierra Leone	Kenema hosp.		2012-02-27	KM821847	KM821847	Andersen et al. 2015
G2392-SLE-2012	Sierra Leone	Kenema hosp.	Homo Kenema	2012-03-14	KM821850	KM821850	Andersen et al. 2015
G2405-SLE-2012	Sierra Leone	Kenema hosp.	Homo Kenema	2012-03-27	KM821852	KM821852	Andersen et al. 2015
G2427-SLE-2012	Sierra Leone	Kenema hosp.	Homo Kenema	2012-03-31	KM821854	KM821854	Andersen et al. 2015
G2431-SLE-2012	Sierra Leone	Kenema hosp.		2012-04-02	KM821856	KM821856	Andersen et al. 2015
G2554-SLE-2012	Sierra Leone	Kenema hosp.	Homo Kenema	2012-06-24	KM821859	KM821859	Andersen et al. 2015
G2557-SLE-2012	Sierra Leone	Kenema hosp.		2012-06-25	KM821861	KM821861	Andersen et al. 2015
G2565-SLE-2012	Sierra Leone	Kenema hosp.	Homo Kenema	2012-07-02	KM821863	KM821863	Andersen et al. 2015
G2612-SLE-2012	Sierra Leone	Kenema hosp.	Homo Kenema	2012-07-23	KM821867	KM821867	Andersen et al. 2015
G2615-SLE-2012	Sierra Leone	Kenema hosp.		2012-07-25	KM821869	KM821869	Andersen et al. 2015
G2723-SLE-2012	Sierra Leone	Kenema hosp.		2012-08-20	KM821871	KM821871	Andersen et al. 2015
G2868-SLE-2012	Sierra Leone	Kenema hosp.	Homo Kenema	2012-10-08	KM821874	KM821874	Andersen et al. 2015
G2903-SLE-2012	Sierra Leone	Kenema hosp.	Homo Kenema	2012-10-29	KM821876	KM821876	Andersen et al. 2015
G2944-SLE-2012	Sierra Leone	Kenema hosp.	Homo Kenema	2012-12-04	KM821880	KM821880	Andersen et al. 2015
G610-SLE-2009	Sierra Leone	Kenema hosp.	Homo Kenema	2009-08-27	KM821777	KM821777	Andersen et al. 2015
G692-SLE-2009	Sierra Leone	Kenema hosp.	Homo Kenema	2009-12-31	KM821783	KM821783	Andersen et al. 2015
G808-SLE-2010	Sierra Leone	Kenema hosp.	Homo Kenema	2010-02-27	KM821792	KM821792	Andersen et al. 2015
NL	Sierra Leone	Kenema hosp.	Homo Kenema	2000-07-15	AY179173	AY179173	Vieth et al. 2004
Josiah	Sierra Leone	Sebgwema hosp.	Homo Kenema	1976-03-11	J04324	J04324	Auperin & McCormick 1989
Togo/2016/7082	Togo	Mango hosp.		2016-02-26	KU961971	KU961971	Whitmer et al. 2018
